# Supplementary material for: McsB forms a gated kinase chamber to mark aberrant bacterial proteins for degradation
Source: eLife. 2021 Jul 30;10:e63505. doi: 10.7554/eLife.63505 (PMC8370763; doi:10.7554/eLife.63505)
Supplement: Figure 3—source data 2. [file elife-63505-fig3-data2.xlsx]

## Sheet: Tabelle1
Figure 3 e
This table displays the absolute number of PSMs, sorted according to peptide sequence and sample.
sequence of arginine phosphopeptide. Modified amino acids are written in small letters	arginine residue	McsB + YwlE, replicate 1	McsB + YwlE, replicate 2	McsB + YwlE, replicate 3	McsB - YwlE, replicate 1	McsB - YwlE, replicate 2	McsB - YwlE, replicate 3
AALIrER	346	0	0	0	1	2	0
ASVmmHLPALVLTrQINR	190	14	18	16	50	49	46
cLsDVRLGIDLGIIK	296	0	0	0	3	2	4
ErLHLEmNGK	348	0	0	0	7	6	5
FVLIrmNDAQPLEK	76	0	0	0	35	37	35
GPESDIVLSSrIR	29	1	1	1	17	23	23
GPESDIVLSsRIRLAR	29	0	0	0	2	5	3
IELEDrVYR	269	2	2	2	8	7	7
LArNFEHIR	34	0	0	0	3	3	2
NFEHIrFPTR	40	2	2	1	104	106	104
QINrIIPAINQLGLVVR	194	31	30	30	56	64	60
QKGPESDIVLSsRIR	29	0	0	0	5	2	4
QKGPESDIVLSSrIRLAR	29	0	0	0	0	1	0
rVLVEK	86	0	0	0	1	0	2
sAREAIYQTSK	255	0	0	0	1	1	0
SYGVLsNcRmIESK	281	6	6	6	23	25	25
VDYAFNEQrGYLTScPTNVGTGLR	161	1	1	1	5	10	9
VYRsYGVLSNcR	272	0	0	0	0	0	1
This table displays the absolute number of PSMs, pooled according to the respective arginine phosphosite. Different phosphopeptides phosphorylated at the same phosphosite are pooled together.
arginine phosphosite	McsB + YwlE, replicate 1	McsB + YwlE, replicate 2	McsB + YwlE, replicate 3	McsB - YwlE, replicate 1	McsB - YwlE, replicate 2	McsB - YwlE, replicate 3
29	1.43915	1.37541	1.37428	23.5219	26.2232	27
34	0	0	0	3.20753	3.14678	2
40	2.8783	2.75083	1.37428	111.194	111.186	104
76	0	0	0	7.48423	6.29356	5
86	0	0	0	1.06918	0	2
161	1.43915	1.37541	1.37428	5.34588	10.4893	9
190	20.1481	24.7575	21.9884	53.4588	51.3974	46
194	44.6137	41.2624	41.2283	59.8739	67.1313	60
255	0	0	0	1.06918	1.04893	0
269	2.8783	2.75083	2.74855	8.55341	7.34249	7
272	0	0	0	0	0	1
281	8.63491	8.25248	8.24566	24.5911	26.2232	25
296	0	0	0	3.20753	2.09785	4
346	0	0	0	1.06918	2.09785	0
348	0	0	0	3.20753	2.09785	4
This table displays the mean values for the three technical replicates of each sample.
arginine phosphosite	McsB + YwlE	McsB - YwlE
29	1.39628	25.5817
34	0	2.78477
40	2.33447	108.794
76	0	6.25926
86	0	1.02306
161	1.39628	8.27838
190	22.298	50.2854
194	42.3681	62.3351
255	0	0.706034
269	2.79256	7.63197
272	0	0.333333
281	8.37768	25.2714
296	0	3.10179
346	0	1.05568
348	0	3.10179
This table displays the standard deviation for the three technical replicates of each sample.
arginine phosphosite	McsB + YwlE	McsB - YwlE
29	0.0303177	1.49063
34	0	0.55547
40	0.68095	3.38954
76	0	1.01447
86	0	0.817148
161	0.0303177	2.16089
190	1.89444	3.14493
194	1.58791	3.39185
255	0	0.49931
269	0.0606355	0.666393
272	0	0.471405
281	0.181906	0.693395
296	0	0.780139
346	0	0.856498
348	0	0.780139
This table calculated the relative amounts of arginine phosphopeptides left.
arginine phosphosite	% pArg left	fraction pArg left	%dephosphorlyated	fraction dephosphorylated
29	5.45813	0.0545813	94.5419	0.945419
34	0	0	100	1
40	2.14578	0.0214578	97.8542	0.978542
76	0	0	100	1
86	0	0	100	1
161	16.8666	0.168666	83.1334	0.831334
190	44.3429	0.443429	55.6571	0.556571
194	67.9684	0.679684	32.0316	0.320316
255	0	0	100	1
269	36.5903	0.365903	63.4097	0.634097
269	0	0	100	1
272	0	0	100	1
281	33.1508	0.331508	66.8492	0.668492
346	0	0	100	1
348	0	0	100	1
