# Supplementary material for: McsB forms a gated kinase chamber to mark aberrant bacterial proteins for degradation
Source: eLife. 2021 Jul 30;10:e63505. doi: 10.7554/eLife.63505 (PMC8370763; doi:10.7554/eLife.63505)
Supplement: Figure 4—source data 3. [file elife-63505-fig4-data3.xlsx]

## Sheet: Tabelle1
	Quantification Figure 4b
	integrated pixel density
	background	504870108	499228731	491505945
	2-mer	364487473	345846161	322518425
	8-mer	462029445	464310672	447749268
		1	2	3
		replicate #
	subtracting background
	integrated pixel density
	background	0	0	0
	2-mer	140382635	153382570	168987520
	8-mer	42840663	34918059	43756677
		1	2	3
		replicate #
	for easier readability all values were first divided by 1 000 000 and afterwards plotted
					mean	SD
	2-mer	140.383	153.383	168.988	154.251	14.3222
	8-mer	42.8407	34.9181	43.7567	40.5051	4.86018
		1	2	3
		replicate #
