# Supplementary material for: McsB forms a gated kinase chamber to mark aberrant bacterial proteins for degradation
Source: eLife. 2021 Jul 30;10:e63505. doi: 10.7554/eLife.63505 (PMC8370763; doi:10.7554/eLife.63505)
Supplement: Figure 5—figure supplement 1—source data 3. [file elife-63505-fig5-figsupp1-data3.xlsx]

## Sheet: Tabelle1
	Standard curve
	McsB amount [ng]	signal [a.u.]
	0	0
	1.25	1343841
	2.5	3325225
	3.75	7162439
	5	7618095
	7.5	11639238
	12.5	17401794
						buoyant density B. subtilis	1,117 mg/ml
						cell volume determination
	time heat-shock [min]	OD600	OD600 adjusted	total volume after OD adjustion [uL]	volume loaded on gel [uL]	weight of 1ml culture [mg]	cell volume based on buoyant density [uL]
	0	0.7	0.7	100	15	0.8218	0.735721
	30	1	0.7	142	15
	60	1.6	0.7	227	15	1.8784	1.68165
	Quantification McsB signal / cell lysate
	time heat-shock [min]	signal [a.u.]	amount in 15 uL volume [ng]	total volume after OD adjustion [uL]	amount in total volume [ng]	cell volume [ul]	final McsB conc [nM]
	0	774113	0.464538	100	3.09692	0.7357	99
	60	4249983	3.94041	227	59.6315	1.6816	836
