# Supplementary material for: McsB forms a gated kinase chamber to mark aberrant bacterial proteins for degradation
Source: eLife. 2021 Jul 30;10:e63505. doi: 10.7554/eLife.63505 (PMC8370763; doi:10.7554/eLife.63505)
Supplement: Figure 5—source data 3. [file elife-63505-fig5-data3.xlsx]

## Sheet: Figure 5a,b
	Quantification Figure 5a,b
	Integrated pixel density
		v-Myc				Kre				b-casein
	background	375705084	378077275	376384763	378898034	345272408	341836097	352106198	351879982	378242828	373697834	374582946	385788898
	dimer	287549167	301965323	272126740	285011752	230851858	262513264	259973205	260068570	242251486	247120396	270305551	259574345
	octamer	249426775	261551502	257261231	246111479	240780987	257900320	262021012	273872939	320978772	313530946	329203086	327695221
		1	2	3	4	1	2	3	4	1	2	3	4
		replicate #				replicate #				replicate #
	Integrated pixel density
		UNC45core				UNC45
	background	357333923	364115759	362060312	367808087	476759009	479523721	492520531	452797551
	dimer	240944883	254650605	254779261	264493901	371753200	372046830	373011851	346707394
	octamer	327556248	333460092	336947841	343298699	418815440	424810229	437479021	400108779
		1	2	3	4	1	2	3	4
		replicate #				replicate #
	subtracting background
	Integrated pixel density
		v-Myc				Kre				b-casein
	background	0	0	0	0	0	0	0	0	0	0	0	0
	dimer	88155917	76111952	104258023	93886282	114420550	79322833	92132993	91811412	135991342	126577438	104277395	126214553
	octamer	126278309	116525773	119123532	132786555	104491421	83935777	90085186	78007043	57264056	60166888	45379860	58093677
		1	2	3	4	1	2	3	4	1	2	3	4
		replicate #				replicate #				replicate #
	Integrated pixel density
		UNC45core				UNC45
	background	0	0	0	0	0	0	0	0
	dimer	116389040	109465154	107281051	103314186	105005809	107476891	119508680	106090157
	octamer	29777675	30655667	25112471	24509388	57943569	54713492	55041510	52688772
		1	2	3	4	1	2	3	4
		replicate #				replicate #
	Fold change (dimer/octamer)
		replicate #
		1	2	3	4	mean	SD
	v-myc	0.698108	0.653177	0.875209	0.707047	0.733385	0.0974434
	Kre	1.09502	0.945042	1.02273	1.17696	1.05994	0.0991821
	beta-casein	2.37481	2.10377	2.29788	2.1726	2.23727	0.121921
	UNC45(core)	3.9086	3.5708	4.27202	4.21529	3.99168	0.32282
	UNC45	1.81221	1.96436	2.17125	2.01352	1.99033	0.147953
	for easier readability all values were first divided by 1 000 000 and afterwards plotted
		v-Myc				Kre				b-casein
	background	0	0	0	0	0	0	0	0	0	0	0	0
	dimer	88.1559	76.112	104.258	93.8863	114.421	79.3228	92.133	91.8114	135.991	126.577	104.277	126.215
	octamer	126.278	116.526	119.124	132.787	104.491	83.9358	90.0852	78.007	57.2641	60.1669	45.3799	58.0937
		1	2	3	4	1	2	3	4	1	2	3	4
		replicate #				replicate #				replicate #
		UNC45core				UNC45
	background	0	0	0	0	0	0	0	0
	dimer	116.389	109.465	107.281	103.314	105.006	107.477	119.509	106.09
	octamer	29.7777	30.6557	25.1125	24.5094	57.9436	54.7135	55.0415	52.6888
		1	2	3	4	1	2	3	4
		replicate #				replicate #

## Sheet: Figure 5d
		Quantification 5d
		Integrated pixel density
			WT			R190A/R194A
		background dimer	452710378	445162059	443576680	451812137	446200323	441901588
		dimer	390208235	379947381	391561630	369791532	365007426	378881730
		background HOO	450015135	444234587	441526310	446663164	440621702	439994461
		HOO	414233422	409080687	411784592	296132894	266346883	295789157
			1	2	3	1	2	3
			replicate #			replicate #
		Background subtraction
		Integrated pixel density
			WT			R190A/R194A
		background dimer	0	0	0	0	0	0
		dimer	62502143	65214678	52015050	82020605	81192897	63019858
		background HOO	0	0	0	0	0	0
		HOO	35781713	35153900	29741718	150530270	174274819	144205304
			1	2	3	1	2	3
			replicate #			replicate #
		Fold change (dimer/HOO)
			replicate #
			1	2	3	mean	SD
		WT	1.74676	1.85512	1.74889	1.78359	0.0619544
		R190A/R194A	0.544878	0.46589	0.437015	0.482594	0.055838
		for easier readability all values were first divided by 1 000 000 and afterwards plotted
			WT			mean	SD	R190A/R194A			mean	SD
		dimer	62.5021	65.2147	52.0151	59.9106	6.97098	82.0206	81.1929	63.0199	75.4111	10.7391
		HOO	35.7817	35.1539	29.7417	33.5591	3.32083	150.53	174.275	144.205	156.337	15.8534
			1	2	3			1	2	3
			replicate #					replicate #
