# Supplementary material for: McsB forms a gated kinase chamber to mark aberrant bacterial proteins for degradation
Source: eLife. 2021 Jul 30;10:e63505. doi: 10.7554/eLife.63505 (PMC8370763; doi:10.7554/eLife.63505)
Supplement: Figure 6—figure supplement 1—source data 3. [file elife-63505-fig6-figsupp1-data3.xlsx]

## Sheet: Tabelle1
	Figure 6 - figure supplement 1a
	Integrated pixel density
		WT				R194K
	background	452710378	445162059	443576680		449690989	443790161	442172794
	30 min	420871510	411838928	410679203		399794157	392993633	398886805
	60 min	390208235	379947381	391561630		361142297	353954870	370529442
		1	2	3		1	2	3
		replicate #				replicate #
	subtracting background
	Integrated pixel density
		WT			mean	R194K
	background	0	0	0		0	0	0
	30 min	31838868	33323131	32897477	32686492	49896832	50796528	43285989
	60 min	62502143	65214678	52015050	5.99106e+07	88548692	89835291	71643352
		1	2	3		1	2	3
		replicate #				replicate #
	Fold change (R194K/WT)
		WT			mean	SD	R194K			mean	SD
	30 min	0.974068	1.01948	1.00645	1	0.0233826	1.52653	1.55405	1.32428	1.46829	0.125472
	60 min	1.04326	1.08853	0.868211	1	0.116356	1.47801	1.49949	1.19584	1.39111	0.169454
		1	2	3			1	2	3
		replicate #					replicate #
