# Supplementary material for: McsB forms a gated kinase chamber to mark aberrant bacterial proteins for degradation
Source: eLife. 2021 Jul 30;10:e63505. doi: 10.7554/eLife.63505 (PMC8370763; doi:10.7554/eLife.63505)
Supplement: Figure 6—figure supplement 2—source data 1. [file elife-63505-fig6-figsupp2-data1.xlsx]

## Sheet: Tabelle1
		cell viability assay
		Figure 6 - figure supplement 2a
			colonies (counted per plate)
			replicate #			technical replicate #
			1	2	3	1	2	3
		WT nonHS 1:1000 dilution	1731	1526	1748	1806	1563	1516
		WT HS 1:100 dilution	844	1514	1286	930	1353	1398
		delta ywlE nonHS 1:1000 dilution	1579	1279	1434	1428	1264	1465
		delta ywlE HS 1:100 dilution	52	114	62	57	89	73
			CFU/ml
			replicate #			technical replicate #
			1	2	3	1	2	3
		WT nonHS	34620000	30520000	34960000	36120000	31260000	30320000
		WT HS	1688000	3028000	2572000	1860000	2706000	2796000
		delta ywlE nonHS	31580000	25580000	28680000	28560000	25280000	29300000
		delta ywlE HS	104000	228000	124000	114000	178000	146000
