# Supplementary material for: McsB forms a gated kinase chamber to mark aberrant bacterial proteins for degradation
Source: eLife. 2021 Jul 30;10:e63505. doi: 10.7554/eLife.63505 (PMC8370763; doi:10.7554/eLife.63505)
Supplement: Figure 6—source data 1. [file elife-63505-fig6-data1.xlsx]

## Sheet: Tabelle1
		cell viability assay 5a
			colonies (counted per plate)
			replicates #
			1	2	3	4	5
		WT nonHS	2811	2688	2831	2871	2651
		WT HS	1672	1631	1707	1520	1612
		delta-mcsB nonHS	3048	3107	3240	3225	2982
		delta-mcsB HS	14	10	13	14	11
		mcsB R194K nonHS	2981	2769	3112	2977	3016
		mcsB R194K HS	320	272	254	270	299
			CFU/ml
			replicates #
			1	2	3	4	5
		WT nonHS	5622000	5376000	5662000	5742000	5302000
		WT HS	3344000	3262000	3414000	3040000	3224000
		delta-mcsB nonHS	6096000	6214000	6480000	6450000	5964000
		delta-mcsB HS	28000	20000	26000	28000	22000
		mcsB R194K nonHS	5962000	5538000	6224000	5954000	6032000
		mcsB R194K HS	640000	544000	508000	540000	598000
